# Supplementary material
Source: Springer Nature journal article supplement (https://www.springermedizin.de/resource/supplementary/12880_2014_236_MOESM5_ESM.pdf/9450304)

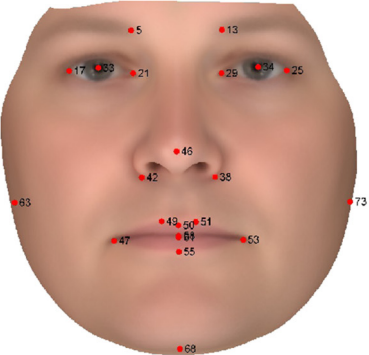

Selection 1

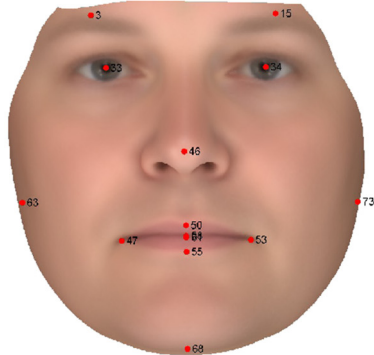

Selection 2

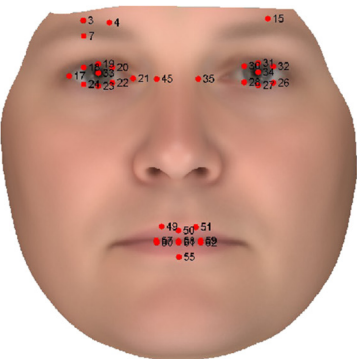

Selection 3

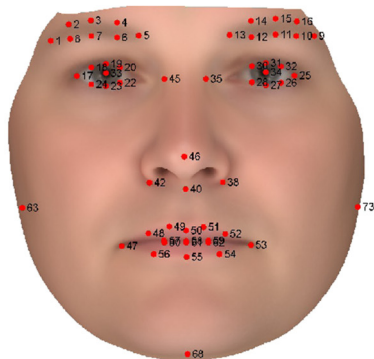

Selection 4

Supplement: MOESM5 [file 9450304]
